# Supplementary material for: Strong sesquiterpene emissions from Amazonian soils
Source: PubMed Central journal article supplement (PMC5993744; doi:10.1038/s41467-018-04658-y), 2018-06-08
Supplement: 41467_2018_4658_MOESM1_ESM.pdf [file 41467_2018_4658_MOESM1_ESM.pdf]

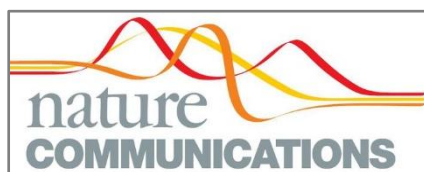

Supplementary information for  
**Strong sesquiterpene emissions from Amazonian soils**

Bourtsoukidis et, al.

| Sample number | Depth      | Ecosyst.                  | Pit             | Coordinates                  | Elev. (m)               | Soil type         | BD (g/cm <sup>3</sup> ) | pH   | Clay (%) | $\Sigma_{RB}$ (m mol kg <sup>-1</sup> ) | Sum of bases (cmol kg <sup>-1</sup> ) | Index П | T (°C)  | Conditions |         |
|---------------|------------|---------------------------|-----------------|------------------------------|-------------------------|-------------------|-------------------------|------|----------|-----------------------------------------|---------------------------------------|---------|---------|------------|---------|
| 1             |            |                           |                 |                              |                         |                   |                         |      |          |                                         |                                       |         | 30      | Aerobic    |         |
| 2             |            |                           |                 |                              |                         |                   |                         |      |          |                                         |                                       |         | 30      | Aerobic    |         |
| 3             |            | Terra Firme (TF1)         | Pit 1           | 02 08'06" S, 59 00'07"W      | 127                     | Ferralsol         | 0,51                    | 3,6  | 81       | 7,79                                    | 2,45                                  | 0       | 30      | Aerobic    |         |
| 4             |            |                           |                 |                              |                         |                   |                         |      |          |                                         |                                       |         | 30      | Aerobic    |         |
| 5             |            |                           |                 |                              |                         |                   |                         |      |          |                                         |                                       |         | 30      | Anaerobic  |         |
| 6             |            |                           |                 |                              |                         |                   |                         |      |          |                                         |                                       |         | 20      | Aerobic    |         |
| 7             |            | Terra Firme (TF2)         | Pit 2           | 02 08'13" S, 58 59'31"W      | 145                     | Ferralsol         | 0,53                    | 3,5  | 81       | 7,8                                     | 3,41                                  | 0       | 30      | Aerobic    |         |
| 8             |            |                           |                 |                              |                         |                   |                         |      |          |                                         |                                       |         | 30      | Anaerobic  |         |
| 9             |            |                           |                 |                              |                         |                   |                         |      |          |                                         |                                       |         | 30      | Aerobic    |         |
| 10            |            | Terra Firme (TF3)         | Pit 3 (ATTO)    | 2 08'38.8"S, 58 59'59.6"W    | 126                     | Ferralsol         | 0,52                    | n.d. | n.d.     | n.d.                                    | n.d.                                  | n.d.    | 20      | Aerobic    |         |
| 11            |            |                           |                 |                              |                         |                   |                         |      |          |                                         |                                       |         | 30      | Anaerobic  |         |
| 12            |            |                           |                 |                              |                         |                   |                         |      |          |                                         |                                       |         | 20      | Flood      |         |
| 13            | 0 - 5 cm   | Terra Firme (TF4)         | Pit 4           | 13 04'35.53"S, 52 22'36.61"W | 246                     | Ferralsol         | 0,86*                   | 4,6  | 48,9*    | 28,3*                                   | 2,32*                                 | 0*      | 30      | Aerobic    |         |
| 14            |            |                           |                 |                              |                         |                   |                         |      |          |                                         |                                       |         | 30      | Aerobic    |         |
| 15            |            | Terra Firme (TF5)         | Pit 5           | 13 04'44.73"S, 52 23'10.21"W | 378                     | Ferralsol         | 0,86*                   | 4,5  | 48,9*    | 28,3*                                   | 2,32*                                 | 0*      | 30      | Aerobic    |         |
| 16            |            |                           |                 |                              |                         |                   |                         |      |          |                                         |                                       |         | 30      | Aerobic    |         |
| 17            |            |                           |                 |                              |                         |                   |                         |      |          |                                         |                                       |         | 20      | Aerobic    |         |
| 18            |            | Floodplain Terrace (FLT1) | Pit 6           | 02 13'24" S, 59 01'56"W      | 40                      | Alisol            | 0,83                    | 3,7  | 65       | 20,59                                   | 2,38                                  | 2       | 30      | Aerobic    |         |
| 19            |            |                           |                 |                              |                         |                   |                         |      |          |                                         |                                       |         | 30      | Anaerobic  |         |
| 20            |            |                           |                 |                              |                         |                   |                         |      |          |                                         |                                       |         | 20      | Aerobic    |         |
| 21            |            | Floodplain Terrace (FLT2) | Pit 7           | 02 14'03.5" S, 59 01'58.4"W  | 30                      | Alisol            | 0,87                    | 3,5  | 64,5     | 22,57                                   | 4,18                                  | 1       | 30      | Aerobic    |         |
| 22            |            |                           |                 |                              |                         |                   |                         |      |          |                                         |                                       |         | 30      | Anaerobic  |         |
| 23            |            |                           |                 |                              |                         |                   |                         |      |          |                                         |                                       | 20      | Aerobic |            |         |
| 24            |            | White sand (WS)           | Pit 8           | 2 11'24.9"S, 59 01'13"W      | 36                      | Podzol / Arenosol | n.d.                    | n.d. | n.d.     | n.d.                                    | n.d.                                  | n.d.    | 20      | Aerobic    |         |
| 25            |            |                           |                 |                              |                         |                   |                         |      |          |                                         |                                       |         | 20      | Aerobic    |         |
| 26            |            | Terra Firme (TF1)         | Pit 1           | 02 08'06" S, 59 00'07"W      | 127                     | Ferralsol         | 0,81                    | 4,2  | 85       | n.d.                                    | 0,51                                  | n.d.    | 30      | Anaerobic  |         |
| 27            |            |                           |                 |                              |                         |                   |                         |      |          |                                         |                                       |         | 20      | Aerobic    |         |
| 28            |            | Terra Firme (TF2)         | Pit 2           | 02 08'13" S, 58 59'31"W      | 145                     | Ferralsol         | 0,80                    | 3,8  | 83       | n.d.                                    | 0,99                                  | n.d.    | 30      | Anaerobic  |         |
| 29            |            |                           |                 |                              |                         |                   |                         |      |          |                                         |                                       |         | 20      | Aerobic    |         |
| 30            |            | Terra Firme (TF3)         | Pit 3 (ATTO)    | 2 08'38.8"S, 58 59'59.6"W    | 126                     | Ferralsol         | 0,80                    | n.d. | n.d.     | n.d.                                    | n.d.                                  | n.d.    | 30      | Anaerobic  |         |
| 31            |            |                           |                 |                              |                         |                   |                         |      |          |                                         |                                       |         | 20      | Aerobic    |         |
| 32            | 10 - 15 cm | Floodplain Terrace (FLT1) | Pit 6           | 2 13'24"S, 59 01'56"W        | 40                      | Alisol            | 1,18                    | 3,8  | 65       | n.d.                                    | 0,71                                  | n.d.    | 30      | Anaerobic  |         |
| 33            |            |                           |                 |                              |                         |                   |                         |      |          |                                         |                                       |         | 30      | Aerobic    |         |
| 34            |            | Floodplain Terrace (FLT2) | Pit 7           | 02 14'03.5" S, 59 01'58.4"W  | 30                      | Alisol            | 1,11                    | 4,3  | 62       | n.d.                                    | 1,24                                  | n.d.    | 30      | Anaerobic  |         |
| 35            |            |                           | White sand (WS) | Pit 8                        | 2 11'24.9"S, 59 01'13"W | 36                | Podzol / Arenosol       | n.d. | n.d.     | n.d.                                    | n.d.                                  | n.d.    | n.d.    | 20         | Aerobic |
| 36            |            |                           |                 |                              |                         |                   |                         |      |          |                                         |                                       |         |         | 20         | Aerobic |
| 37            | 45 - 50 cm | Terra Firme (TF1)         | Pit 1           | 02 08'06" S, 59 00'07"W      | 127                     | Ferralsol         | 1,09                    | 4,5  | 81       | n.d.                                    | 0,25                                  | n.d.    | 20      | Aerobic    |         |
| 38            |            |                           |                 |                              |                         |                   |                         |      |          |                                         |                                       |         | 20      | Aerobic    |         |
| 39            |            | Terra Firme (TF3)         | Pit 3 (ATTO)    | 2 08'38.8"S, 58 59'59.6"W    | 126                     | Ferralsol         | n.d.                    | n.d. | n.d.     | n.d.                                    | n.d.                                  | n.d.    | 20      | Aerobic    |         |

|    |                           |       |                              |    |                   |      |      |      |      |      |      |    |         |
|----|---------------------------|-------|------------------------------|----|-------------------|------|------|------|------|------|------|----|---------|
| 40 | Floodplain Terrace (FLT1) | Pit 6 | 02 13'24" S,<br>59 01'56"W   | 40 | Alisol            | 1,29 | 4,3  | 65,5 | n.d. | 0,42 | n.d. | 20 | Aerobic |
| 41 | Floodplain Terrace (FLT2) | Pit 7 | 2 14'03.5"S,<br>59 01'58.4"W | 30 | Alisol            | 1,19 | 4,5  | 71   | n.d. | 0,72 | n.d. | 20 | Aerobic |
| 42 | White sand (WS)           | Pit 8 | 2 11'24.9"S,<br>59 01'13"W   | 36 | Podzol / Arenosol | n.d. | n.d. | n.d. | n.d. | n.d. | n.d. | 20 | Aerobic |

**Supplementary Table 1 | Sample characteristics and treatments.** An overview of the soil desiccation experiments is presented for the different soil types, depths, temperature and conditions. All plateau soils were classified as Ferralsol with advanced state of pedogenetic development, low nutrient and high clay content. Terrace soils were classified as Alisols, which are intermediate aged soils with relatively high element content on a clay bases. Similarly, total reserve bases ( $\Sigma_{RB}$ ; the sum of total cations Ca, Mg, K and Na are presented only for the first 10cm of soil depth) was approximately three times higher in the terrace soils indicating that these soils display a lower pedogenetic development compared to the TF soils. Anaerobic conditions were achieved by the use of cleaned compressed air and anaerobic by using a pressurized bottle of nitrogen (6.0). As “flood” we refer to a single experiment (S9) where anaerobic conditions were achieved by flooding the soil sample to 3 times its soil saturation capacity. Incubation temperature indicates the temperature inside each chamber. The values that were not defined are indicated with n.d. while the \* symbol indicates the values for a pit in the vicinity (12°55'15.49'' S , 52°22'22.75''W).

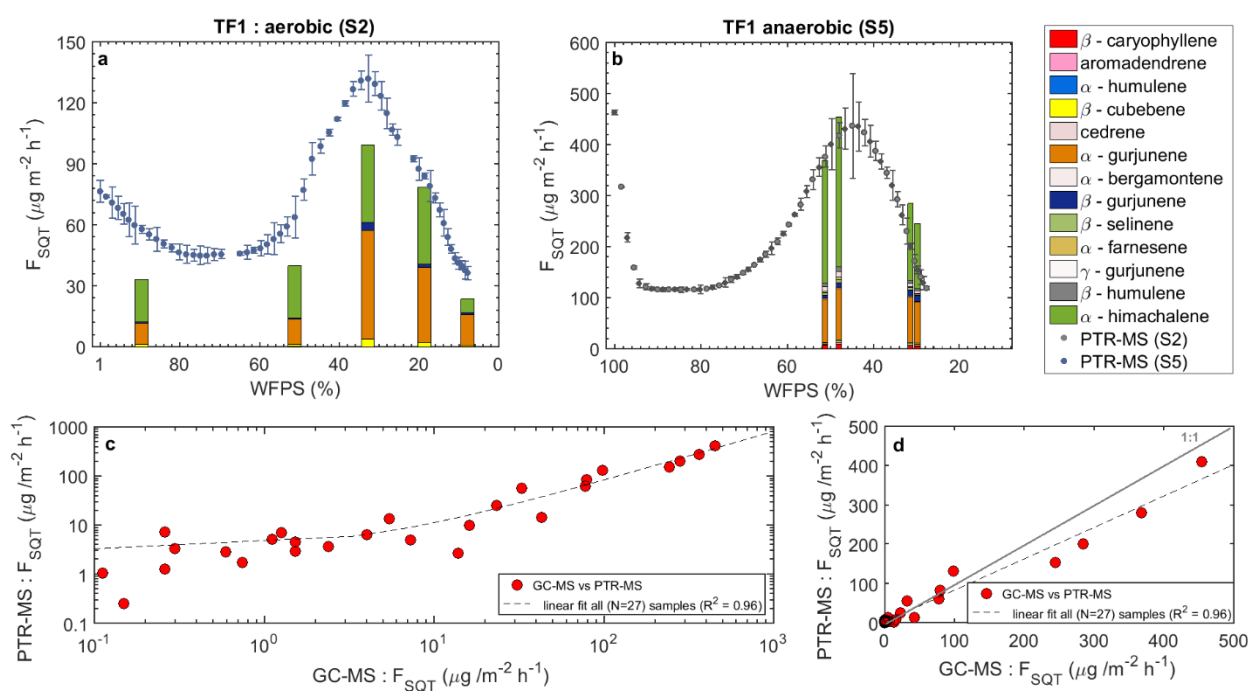

**Supplementary Figure 1 | Comparison of PTR-MS and GC-MS measurements.** During a. aerobic (sample S2) and b. anaerobic (sample S5) desiccation of TF1 soils. The markers indicate the measurement points from PTR-MS and the error bars the std (N=4) of each measurement point. The stacked bar plots indicate the GC-MS measurements with the respective SQT species to be denoted at the colored legend on the right. In c, all simultaneous measurements (N = 27) between PTR-MS and GC-MS appear as red circles together with a linear regression fit. In d, the same points are plotted in linear scale to illustrate the possible underestimation of the PTR-MS measurements.
